# Supplementary material for: Association between Heated Tobacco Product Use during Pregnancy and Fetal Growth in Japan: A Nationwide Web-Based Survey
Source: MDPI journal article supplement (doi:10.3390/ijerph191811826), 2022-09-19
Supplement: s1 [file s1]

# Association between heated tobacco product use during pregnancy and fetal growth in Japan: A nationwide web-based survey

## Supplementary Material

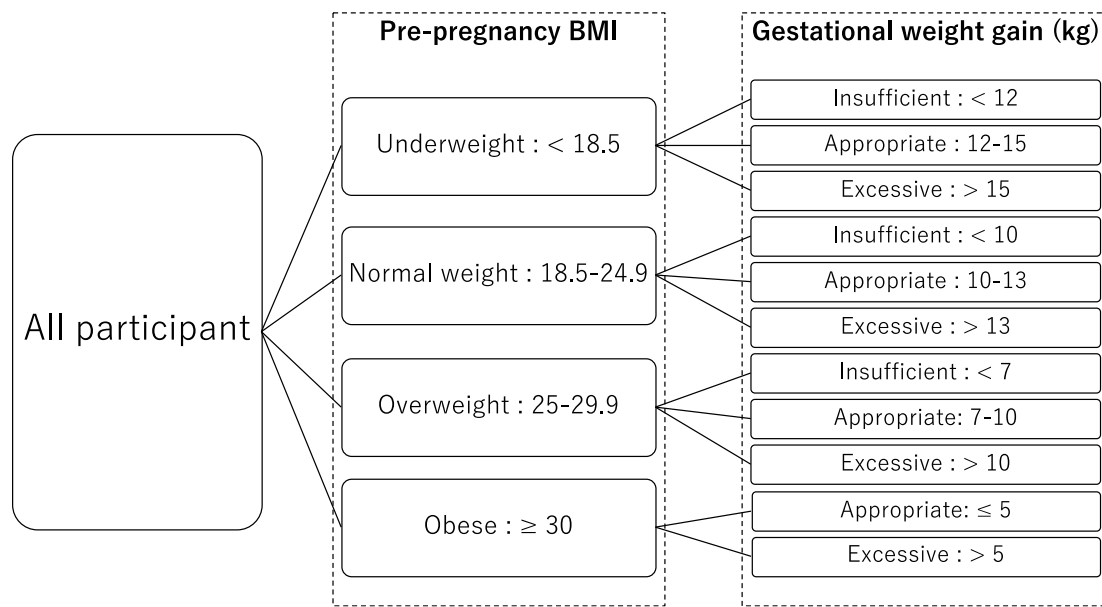

**Figure S1. Categories of postdelivery women based on pre-pregnancy BMI and weight gain during pregnancy**  
The participants were classified into the following four groups according to their pre-pregnancy BMI: underweight, normal weight, overweight, and obese. Subsequently, the weight gain during pregnancy was classified into the following groups based on the appropriate weight gain during pregnancy according to the pre-pregnancy BMI: insufficient, appropriate, and excessive.  
BMI, body mass index

**Table S1.** Prefecture distribution of participants, all postpartum women in 2020, and Japanese women between the ages of 20 and 50 years

|           | Study participants<br>n = 5,682 |      | Japanese postpartum<br>women in 2020 <sup>a</sup><br>n = 840,804 |      | Japanese women between<br>the ages of 20 and 50 years <sup>b</sup><br>n = 21,385,480 |      |
|-----------|---------------------------------|------|------------------------------------------------------------------|------|--------------------------------------------------------------------------------------|------|
|           | N                               | %    | N                                                                | %    | N                                                                                    | %    |
| Hokkaido  | 215                             | 3.8  | 29,523                                                           | 3.5  | 852,270                                                                              | 4.0  |
| Aomori    | 43                              | 0.8  | 6,837                                                            | 0.8  | 186,850                                                                              | 0.9  |
| Iwate     | 22                              | 0.4  | 6,718                                                            | 0.8  | 180,134                                                                              | 0.8  |
| Miyagi    | 113                             | 2.0  | 14,480                                                           | 1.7  | 395,843                                                                              | 1.9  |
| Akita     | 28                              | 0.5  | 4,499                                                            | 0.5  | 133,611                                                                              | 0.6  |
| Yamagata  | 36                              | 0.6  | 6,217                                                            | 0.7  | 157,451                                                                              | 0.7  |
| Fukushima | 59                              | 1.0  | 11,215                                                           | 1.3  | 283,832                                                                              | 1.3  |
| Ibaraki   | 88                              | 1.5  | 17,389                                                           | 2.1  | 457,670                                                                              | 2.1  |
| Tochigi   | 59                              | 1.0  | 11,807                                                           | 1.4  | 311,780                                                                              | 1.5  |
| Gunma     | 60                              | 1.1  | 11,660                                                           | 1.4  | 303,765                                                                              | 1.4  |
| Saitama   | 330                             | 5.8  | 47,327                                                           | 5.6  | 1,278,916                                                                            | 6.0  |
| Chiba     | 242                             | 4.3  | 40,168                                                           | 4.8  | 1,079,368                                                                            | 5.0  |
| Tokyo     | 675                             | 11.9 | 99,661                                                           | 11.9 | 2,732,942                                                                            | 12.8 |
| Kanagawa  | 400                             | 7.0  | 60,865                                                           | 7.2  | 1,637,391                                                                            | 7.7  |
| Niigata   | 87                              | 1.5  | 12,980                                                           | 1.5  | 339,664                                                                              | 1.6  |
| Toyama    | 55                              | 1.0  | 6,256                                                            | 0.7  | 160,076                                                                              | 0.7  |
| Ishikawa  | 49                              | 0.9  | 7,712                                                            | 0.9  | 185,127                                                                              | 0.9  |
| Fukui     | 29                              | 0.5  | 5,313                                                            | 0.6  | 119,996                                                                              | 0.6  |
| Yamanashi | 31                              | 0.5  | 5,184                                                            | 0.6  | 124,586                                                                              | 0.6  |
| Nagano    | 81                              | 1.4  | 12,864                                                           | 1.5  | 314,660                                                                              | 1.5  |
| Gifu      | 111                             | 2.0  | 12,092                                                           | 1.4  | 311,264                                                                              | 1.5  |
| Shizuoka  | 157                             | 2.8  | 22,497                                                           | 2.7  | 571,764                                                                              | 2.7  |
| Aichi     | 470                             | 8.3  | 55,613                                                           | 6.6  | 1,296,231                                                                            | 6.1  |
| Mie       | 66                              | 1.2  | 11,141                                                           | 1.3  | 280,724                                                                              | 1.3  |
| Shiga     | 68                              | 1.2  | 10,437                                                           | 1.2  | 241,726                                                                              | 1.1  |
| Kyoto     | 129                             | 2.3  | 16,440                                                           | 2.0  | 433,516                                                                              | 2.0  |
| Osaka     | 521                             | 9.2  | 61,878                                                           | 7.4  | 1,592,330                                                                            | 7.4  |
| Hyogo     | 295                             | 5.2  | 36,952                                                           | 4.4  | 940,222                                                                              | 4.4  |

|           |     |     |        |     |         |     |
|-----------|-----|-----|--------|-----|---------|-----|
| Nara      | 61  | 1.1 | 7,831  | 0.9 | 220,184 | 1.0 |
| Wakayama  | 40  | 0.7 | 5,732  | 0.7 | 145,974 | 0.7 |
| Tottori   | 30  | 0.5 | 3,783  | 0.4 | 85,885  | 0.4 |
| Shimane   | 30  | 0.5 | 4,473  | 0.5 | 97,532  | 0.5 |
| Okayama   | 90  | 1.6 | 13,521 | 1.6 | 311,301 | 1.5 |
| Hiroshima | 168 | 3.0 | 19,606 | 2.3 | 462,122 | 2.2 |
| Yamaguchi | 60  | 1.1 | 8,203  | 1.0 | 201,415 | 0.9 |
| Tokushima | 24  | 0.4 | 4,521  | 0.5 | 112,767 | 0.5 |
| Kagawa    | 36  | 0.6 | 6,179  | 0.7 | 155,547 | 0.7 |
| Hiroshima | 62  | 1.1 | 8,102  | 1.0 | 210,105 | 1.0 |
| Kochi     | 19  | 0.3 | 4,082  | 0.5 | 104,624 | 0.5 |
| Fukuoka   | 248 | 4.4 | 38,967 | 4.6 | 911,395 | 4.3 |
| Saga      | 32  | 0.6 | 6,004  | 0.7 | 130,220 | 0.6 |
| Nagasaki  | 40  | 0.7 | 9,182  | 1.1 | 201,256 | 0.9 |
| Kumamoto  | 55  | 1.0 | 13,011 | 1.5 | 275,514 | 1.3 |
| Oita      | 45  | 0.8 | 7,582  | 0.9 | 174,646 | 0.8 |
| Miyazaki  | 34  | 0.6 | 7,719  | 0.9 | 166,417 | 0.8 |
| Kagoshima | 58  | 1.0 | 11,638 | 1.4 | 248,916 | 1.2 |
| Okinawa   | 31  | 0.5 | 14,943 | 1.8 | 265,951 | 1.2 |

<sup>a</sup> Data on postpartum women in 2020 stratified by prefecture were extracted from government data.

<sup>b</sup> Data for women aged between 20 and 50 years stratified by prefecture were extracted from government data.

**Table S2.** Maternal characteristics of participants in this analysis

|                                        | N (%)                                       |                                  |                                     |                                             |
|----------------------------------------|---------------------------------------------|----------------------------------|-------------------------------------|---------------------------------------------|
|                                        | Lifetime<br>never<br>smokers<br>(N = 4,144) | Former<br>smokers<br>(N = 1,274) | Sole<br>HTP<br>smokers<br>(N = 102) | Sole<br>combustio<br>n smokers<br>(N = 127) |
| Delivery date                          |                                             |                                  |                                     |                                             |
| July 2019–February 2020                | 553 (13.3)                                  | 156 (12.2)                       | 14 (13.7)                           | 25 (19.7)                                   |
| March 2020–August 2020                 | 1,020<br>(24.6)                             | 335 (26.3)                       | 29 (28.4)                           | 29 (22.8)                                   |
| September 2020–February 2021           | 1,507<br>(36.4)                             | 475 (37.3)                       | 31 (30.4)                           | 48 (37.8)                                   |
| March 2021–August 2021                 | 1,064<br>(25.7)                             | 308 (24.2)                       | 28 (27.5)                           | 25 (19.7)                                   |
| Maternal age at survey                 |                                             |                                  |                                     |                                             |
| < 25 years                             | 106 (2.6)                                   | 48 (3.8)                         | 9 (8.8)                             | 10 (7.9)                                    |
| 25–29 years                            | 1,122<br>(27.1)                             | 281 (22.1)                       | 37 (36.3)                           | 31 (24.4)                                   |
| 30–34 years                            | 1,753<br>(42.3)                             | 476 (37.4)                       | 35 (34.3)                           | 33 (26.0)                                   |
| 35–39 years                            | 985 (23.8)                                  | 390 (30.6)                       | 18 (17.6)                           | 44 (34.6)                                   |
| ≥ 40 years                             | 178 (4.3)                                   | 79 (6.2)                         | 3 (2.9)                             | 9 (7.1)                                     |
| Nulliparity                            | 2,282<br>(55.1)                             | 635 (49.8)                       | 56 (54.9)                           | 64 (50.4)                                   |
| Pre-pregnancy BMI (kg/m <sup>2</sup> ) |                                             |                                  |                                     |                                             |
| < 18.5                                 | 796 (19.2)                                  | 212 (16.6)                       | 27 (26.5)                           | 19 (15.0)                                   |
| 18.5–24.9                              | 2,952<br>(71.2)                             | 895 (70.3)                       | 63 (61.8)                           | 87 (68.5)                                   |
| 25–29.9                                | 235 (5.7)                                   | 107 (8.4)                        | 7 (6.9)                             | 16 (12.6)                                   |
| ≥ 30                                   | 161 (3.9)                                   | 60 (4.7)                         | 5 (4.9)                             | 5 (3.9)                                     |
| Gestational weight gain (GWG)          |                                             |                                  |                                     |                                             |
| Pre-pregnancy BMI: underweight         |                                             |                                  |                                     |                                             |
| Insufficient: <12 kg                   | 628 (15.2)                                  | 143 (11.2)                       | 13 (12.7)                           | 13 (10.2)                                   |
| Appropriate: 15 kg ≥ GWG ≥ 12 kg       | 128 (3.1)                                   | 51 (4.0)                         | 9 (8.8)                             | 4 (3.1)                                     |
| Excessive: > 15 kg                     | 40 (1.0)                                    | 18 (1.4)                         | 5 (4.9)                             | 2 (1.6)                                     |
| Pre-pregnancy BMI: normal weight       |                                             |                                  |                                     |                                             |
| Insufficient: < 10 kg                  | 1,589<br>(38.3)                             | 401 (31.5)                       | 24 (23.5)                           | 31 (24.4)                                   |
| Appropriate: 13 kg ≥ GWG ≥ 10 kg       | 1,036<br>(25.0)                             | 333 (26.1)                       | 19 (18.6)                           | 28 (22.0)                                   |
| Excessive: > 13 kg                     | 327 (7.9)                                   | 161 (12.6)                       | 20 (19.6)                           | 28 (22.0)                                   |

|                                                    |              |              |           |            |
|----------------------------------------------------|--------------|--------------|-----------|------------|
| Pre-pregnancy BMI: overweight                      |              |              |           |            |
| Insufficient: < 7 kg                               | 114 (2.8)    | 51 (4.0)     | 2 (2.0)   | 8 (6.3)    |
| Appropriate: 10 kg $\geq$ GWG $\geq$ 7 kg          | 72 (1.7)     | 36 (2.8)     | 1 (1.0)   | 6 (4.7)    |
| Excessive: > 10 kg                                 | 49 (1.2)     | 20 (1.6)     | 4 (3.9)   | 2 (1.6)    |
| Pre-pregnancy BMI: obese                           |              |              |           |            |
| Appropriate: $\leq$ 5 kg                           | 54 (1.3)     | 30 (2.4)     | 3 (2.9)   | 1 (0.8)    |
| Excessive: > 5 kg                                  | 107 (2.6)    | 30 (2.4)     | 2 (2.0)   | 4 (3.1)    |
| In vitro fertilization                             | 273 (6.6)    | 100 (7.8)    | 1 (1.0)   | 6 (4.7)    |
| Smoking during the first trimester                 | 0 (0.0)      | 0 (0.0)      | 95 (93.1) | 121 (95.3) |
| Smoking during the second and third trimesters     | 0 (0.0)      | 0 (0.0)      | 44 (43.1) | 49 (38.6)  |
| Passive smoking everyday                           | 299 (7.2)    | 213 (16.7)   | 64 (62.7) | 59 (46.5)  |
| Educational attainment $\geq$ 13 years             | 3,636 (87.7) | 970 (76.1)   | 60 (58.8) | 75 (59.1)  |
| Married                                            | 4,099 (98.9) | 1,254 (98.4) | 98 (96.1) | 117 (92.1) |
| Maternal complication                              |              |              |           |            |
| Chronic hypertension                               | 208 (5.0)    | 84 (6.6)     | 5 (4.9)   | 11 (8.7)   |
| Diabetes                                           | 114 (2.8)    | 46 (3.6)     | 6 (5.9)   | 7 (5.5)    |
| Chronic kidney disease                             | 15 (0.4)     | 3 (0.2)      | 3 (2.9)   | 1 (0.8)    |
| Autoimmune disease                                 | 39 (0.9)     | 13 (1.0)     | 3 (2.9)   | 2 (1.6)    |
| Household income per year                          |              |              |           |            |
| < 5 million JPY                                    | 907 (21.9)   | 356 (27.9)   | 29 (28.4) | 46 (36.2)  |
| 5 to < 8 million JPY                               | 1,342 (32.4) | 428 (33.6)   | 28 (27.5) | 34 (26.8)  |
| $\geq$ 8 million JPY                               | 1,618 (39.0) | 434 (34.1)   | 36 (35.3) | 39 (30.7)  |
| Declined to answer or do not know                  | 277 (6.7)    | 56 (4.4)     | 9 (8.8)   | 8 (6.3)    |
| Manager                                            | 363 (8.8)    | 84 (6.6)     | 8 (7.8)   | 13 (10.2)  |
| Living in a prefecture with > 5 million population | 2,486 (60.0) | 741 (58.2)   | 77 (75.5) | 76 (59.8)  |

BMI, body mass index; HTPs, heated tobacco products; JPY, Japanese yen

**Table S3.** Odds ratios for small for gestational age among former smokers, sole HTP smokers, and sole combustion smokers estimated using unconditional logistic regression

|                                            | Odds ratio (95% confidence interval) |                      |                      |
|--------------------------------------------|--------------------------------------|----------------------|----------------------|
|                                            | Model 1 <sup>a</sup>                 | Model 2 <sup>b</sup> | Model 3 <sup>c</sup> |
| Smoking status during pregnancy            |                                      |                      |                      |
| Lifetime never smokers                     | Reference                            | Reference            | Reference            |
| Former smokers                             | 1.29 (0.89–1.87)                     | 1.24 (0.85–1.87)     | 1.23 (0.84–1.79)     |
| Sole HTP smokers                           | 2.68 (1.13–6.36)                     | 2.49 (1.04–5.97)     | 2.50 (1.03–6.05)     |
| Sole combustion smokers                    | 2.13 (0.90–5.03)                     | 1.96 (0.82–4.69)     | 1.95 (0.81–4.67)     |
| Maternal age at survey                     |                                      |                      |                      |
| < 25 years                                 | 1.62 (0.66–3.99)                     | 1.46 (0.59–3.63)     | 1.44 (0.58–3.59)     |
| 25–29 years                                | Reference                            | Reference            | Reference            |
| 30–34 years                                | 1.54 (1.00–2.36)                     | 1.56 (1.02–2.41)     | 1.60 (1.03–2.46)     |
| 35–39 years                                | 1.42 (0.88–2.28)                     | 1.45 (0.90–2.34)     | 1.43 (0.89–2.32)     |
| ≥ 40 years                                 | 2.17 (1.09–4.31)                     | 2.19 (1.09–4.37)     | 2.05 (1.02–4.11)     |
| Pre-pregnancy BMI, Gestational weight gain |                                      |                      |                      |
| PreBMI: underweight, GWG: insufficient     | 3.98 (2.37–6.67)                     | 3.98 (2.37–6.68)     | 4.15 (2.46–6.98)     |
| PreBMI: underweight, GWG: appropriate      | 1.32 (0.45–3.89)                     | 1.31 (0.44–3.85)     | 1.35 (0.46–4.00)     |
| PreBMI: underweight, GWG: excessive        | 0.97 (0.13–7.32)                     | 0.93 (0.12–7.06)     | 0.99 (0.13–7.51)     |
| PreBMI: normal weight, GWG: insufficient   | 2.28 (1.41–3.71)                     | 2.26 (1.39–3.67)     | 2.31 (1.42–3.75)     |
| PreBMI: normal weight, GWG: appropriate    | Reference                            | Reference            | Reference            |
| PreBMI: normal weight, GWG: excessive      | 1.00 (0.45–2.19)                     | 0.98 (0.44–2.15)     | 0.95 (0.43–2.10)     |
| PreBMI: overweight, GWG: insufficient      | 1.03 (0.30–3.47)                     | 0.99 (0.29–3.35)     | 0.90 (0.27–3.07)     |
| PreBMI: overweight, GWG: appropriate       | 0.50 (0.07–3.75)                     | 0.48 (0.06–3.63)     | 0.42 (0.06–3.20)     |
| PreBMI: overweight, GWG: excessive         | 1.60 (0.37–6.97)                     | 1.48 (0.34–6.49)     | 1.22 (0.28–5.41)     |
| PreBMI: obese, GWG: appropriate            | 0.68 (0.09–5.14)                     | 0.68 (0.09–5.10)     | 0.64 (0.09–4.84)     |
| PreBMI: obese, GWG: excessive              | 1.33 (0.39–4.49)                     | 1.30 (0.38–4.42)     | 1.27 (0.37–4.33)     |
| Household income per year                  |                                      |                      |                      |
| < 5 million JPY                            |                                      | 1.21 (0.79–1.85)     | 1.20 (0.79–1.84)     |
| 5 to < 8 million JPY                       |                                      | Reference            | Reference            |
| ≥ 8 million JPY                            |                                      | 1.14 (0.77–1.69)     | 1.16 (0.78–1.72)     |
| Declined to answer or do not know          |                                      | 1.45 (0.77–2.74)     | 1.46 (0.77–2.76)     |
| Manager                                    |                                      |                      |                      |

|                                                |                  |                   |
|------------------------------------------------|------------------|-------------------|
| Yes                                            | 0.81 (0.43–1.51) | 0.80 (0.42–1.49)  |
| No                                             | Reference        | Reference         |
| Education attainment                           |                  |                   |
| ≥ 13 years                                     | Reference        | Reference         |
| < 13 years                                     | 1.32 (0.87–2.00) | 1.31 (0.86–1.99)  |
| Live in prefecture with > 5 million population |                  |                   |
| Yes                                            | Reference        | Reference         |
| No                                             | 1.17 (0.85–1.60) | 1.17 (0.85–1.62)  |
| Date of delivery                               |                  |                   |
| July 2019–February 2020                        | Reference        | Reference         |
| March 2020–August 2020                         | 1.18 (0.70–2.01) | 1.15 (0.68–1.96)  |
| September 2020–February 2021                   | 1.14 (0.68–1.89) | 1.10 (0.66–1.84)  |
| March 2021–August 2021                         | 1.01 (0.58–1.76) | 0.99 (0.57–1.72)  |
| Hypertensive disorders of pregnancy            |                  |                   |
| Yes                                            |                  | 2.32 (1.44–3.74)  |
| No                                             |                  | Reference         |
| Chronic kidney disease                         |                  |                   |
| Yes                                            |                  | 1.62 (0.19–13.96) |
| No                                             |                  | Reference         |
| Autoimmune diseases                            |                  |                   |
| Yes                                            |                  | 0.44 (0.05–3.67)  |
| No                                             |                  | Reference         |

BMI, body mass index; GWG, gestational weight gain; HTPs, heated tobacco products; JPY, Japanese yen; PreBMI, pre-pregnancy body mass index; SGA, small for gestational age

<sup>a</sup> Multiple logistic regression adjusted for maternal age, pre-pregnancy body mass index, and gestational weight gain.

<sup>b</sup> Additional adjustment for household income, occupation, education attainment, living in a prefecture with >5 million population, and date of delivery.

<sup>c</sup> Additional adjustment for hypertensive disorders of pregnancy, chronic kidney disease, and autoimmune diseases.

**Table S4.** Odds ratios for small for gestational age among lifetime never smokers, sole HTP smokers (< 10 per day), and sole HTP smokers (≥ 10 per day) estimated using unconditional logistic regression

|                                            | Odds ratio (95% confidence interval) |                      |                      |
|--------------------------------------------|--------------------------------------|----------------------|----------------------|
|                                            | Model 1 <sup>a</sup>                 | Model 2 <sup>b</sup> | Model 3 <sup>c</sup> |
| Smoking status during pregnancy            |                                      |                      |                      |
| Lifetime never smokers                     | Reference                            | Reference            | Reference            |
| sole HTP smokers < 10 per day              | 1.77 (0.41–7.64)                     | 1.58 (0.36–6.94)     | 1.45 (0.32–6.67)     |
| sole HTP smokers ≥ 10 per day              | 3.48 (1.20–10.09)                    | 3.14 (1.06–9.30)     | 3.14 (1.06–9.30)     |
| Maternal age at survey                     |                                      |                      |                      |
| < 25 years                                 | 1.48 (0.50–4.34)                     | 1.35 (0.45–4.02)     | 1.44 (0.48–4.28)     |
| 25–29 years                                | Reference                            | Reference            | Reference            |
| 30–34 years                                | 1.34 (0.84–2.15)                     | 1.37 (0.85–2.21)     | 1.41 (0.87–2.26)     |
| 35–39 years                                | 0.93 (0.52–1.65)                     | 0.96 (0.54–1.71)     | 0.95 (0.53–1.70)     |
| ≥ 40 years                                 | 2.29 (1.05–5.01)                     | 2.31 (1.05–5.08)     | 2.08 (0.94–4.63)     |
| Pre-pregnancy BMI, Gestational weight gain |                                      |                      |                      |
| PreBMI: underweight, GWG: insufficient     | 5.72 (2.89–11.33)                    | 5.74 (2.90–11.39)    | 6.04 (3.04–12.01)    |
| PreBMI: underweight, GWG: appropriate      | 1.30 (0.28–5.96)                     | 1.28 (0.28–5.86)     | 1.38 (0.30–6.36)     |
| PreBMI: underweight, GWG: excessive        | 1.98 (0.25–15.92)                    | 1.86 (0.23–15.13)    | 1.96 (0.24–15.94)    |
| PreBMI: normal weight, GWG: insufficient   | 3.26 (1.70–6.27)                     | 3.20 (1.66–6.15)     | 3.33 (1.73–6.42)     |
| PreBMI: normal weight, GWG: appropriate    | Reference                            | Reference            | Reference            |
| PreBMI: normal weight, GWG: excessive      | 1.28 (0.44–3.72)                     | 1.25 (0.43–3.64)     | 1.23 (0.42–3.63)     |
| PreBMI: overweight, GWG: insufficient      | 2.49 (0.68–9.09)                     | 2.41 (0.66–8.84)     | 2.24 (0.61–8.27)     |
| PreBMI: overweight, GWG: appropriate       | 1.26 (0.16–9.96)                     | 1.22 (0.16–9.67)     | 1.15 (0.14–9.15)     |
| PreBMI: overweight, GWG: excessive         | 1.60 (0.20–12.91)                    | 1.52 (0.19–12.36)    | 1.34 (0.17–10.89)    |
| PreBMI: obese, GWG: appropriate            | 1.53 (0.19–12.13)                    | 1.56 (0.20–12.39)    | 1.40 (0.17–11.20)    |
| PreBMI: obese, GWG: excessive              | 1.69 (0.37–7.73)                     | 1.65 (0.36–7.63)     | 1.64 (0.36–7.57)     |
| Household income per year                  |                                      |                      |                      |
| < 5 million JPY                            |                                      | 1.23 (0.73–2.07)     | 1.23 (0.73–2.07)     |
| 5 to < 8 million JPY                       |                                      | Reference            | Reference            |
| ≥ 8 million JPY                            |                                      | 1.21 (0.76–1.93)     | 1.25 (0.78–1.99)     |
| Declined to answer or do not know          |                                      | 1.43 (0.69–2.98)     | 1.46 (0.70–3.04)     |
| Manager                                    |                                      |                      |                      |
| Yes                                        |                                      | 0.66 (0.30–1.44)     | 0.66 (0.30–1.45)     |



|                                                |                  |                   |
|------------------------------------------------|------------------|-------------------|
| No                                             | Reference        | Reference         |
| Education attainment                           |                  |                   |
| ≥ 13 years                                     | Reference        | Reference         |
| < 13 years                                     | 1.43 (0.85–2.41) | 1.45 (0.86–2.44)  |
| Live in prefecture with > 5 million population |                  |                   |
| Yes                                            | Reference        | Reference         |
| No                                             | 1.00 (0.68–1.46) | 1.01 (0.69–1.48)  |
| Date of delivery                               |                  |                   |
| July 2019–February 2020                        | Reference        | Reference         |
| March 2020–August 2020                         | 1.40 (0.71–2.77) | 1.35 (0.68–2.67)  |
| September 2020–February 2021                   | 1.52 (0.80–2.92) | 1.46 (0.76–2.80)  |
| March 2021–August 2021                         | 1.22 (0.61–2.45) | 1.18 (0.59–2.37)  |
| Hypertensive disorders of pregnancy            |                  |                   |
| Yes                                            |                  | 2.44 (1.36–4.35)  |
| No                                             |                  | Reference         |
| Chronic kidney disease                         |                  |                   |
| Yes                                            |                  | 3.51 (0.43–28.65) |
| No                                             |                  | Reference         |

BMI, body mass index; GWG, gestational weight gain; HTPs, heated tobacco products; JPY, Japanese yen; PreBMI, pre-pregnancy body mass index;

<sup>a</sup> Multiple logistic regression adjusted for maternal age, pre-pregnancy body mass index, and gestational weight gain.

<sup>b</sup> Additional adjustment for household income, occupation, education attainment, living in a prefecture with over 5 million population, and date of delivery.

<sup>c</sup> Additional adjustment for hypertensive disorders of pregnancy, and chronic kidney disease.
